# Supplementary material
Source: PubMed Central journal article supplement (PMC3535852)
Supplement: EC.00266-12_zek999094021so1.pdf [file EC.00266-12_zek999094021so1.pdf]

## Supplemental material

**Video S1.** Interaction of human neutrophils with a derivative of *C. albicans* strain WO-1 that expresses *GFP* in the white phase and *RFP* in the opaque phase (strain WOP4R22WH11G22B). Neutrophils selectively take up the *GFP*-expressing white cells.

**Video S2.** Interaction of human neutrophils with a derivative of *C. albicans* strain WO-1 that expresses *RFP* in the white phase and *GFP* in the opaque phase (strain WOP4G42WH11R22B). Neutrophils selectively take up the *RFP*-expressing white cells.

**Video S3.** Interaction of human neutrophils with *RFP*-expressing white cells and *GFP*-expressing opaque cells (strain WOP4G42WH11R22A). The video shows the phagocytosis of a white cell with a long germ tube by a neutrophil.

**Video S4.** Selective phagocytosis of germ-tubing forming white cells by a human neutrophil. Strain WOP4R22WH11G22B was used in this experiment.

**Videos S5 and S6.** Interaction of dendritic cells with *RFP*-expressing white cells and *GFP*-expressing opaque cells of strain WOP4G42WH11R22A. DCs phagocytose both white and opaque cells. Due to a technical problem, the videos start 40 min after the beginning of the coculture.

**Video S7.** Interaction of human neutrophils with *GFP*-expressing white cells and *RFP*-expressing opaque cells within a collagen matrix. The video shows the phagocytosis of both white and opaque cells by a neutrophil. Due to the three-dimensional environment, the cells sometimes move out of the focal plane. Strain WOP4R22WH11G22B was used in this experiment.
